# Supplementary material for: Studies on the Reaction of Dietary Methylglyoxal and Creatine during Simulated Gastrointestinal Digestion and in Human Volunteers
Source: MDPI journal article supplement (doi:10.3390/nu14173598), 2022-08-31
Supplement: s1 [file s1]

*Supplementary Materials*

# Studies on the Reaction of Dietary Methylglyoxal and Creatine During Simulated Gastrointestinal Digestion and in Human Volunteers

Stephanie Treibmann <sup>1,\*</sup>, Julia Groß <sup>1</sup>, Susann Pätzold <sup>1</sup> and Thomas Henle <sup>1,\*</sup>

<sup>1</sup> Chair of Food Chemistry, Technische Universität Dresden, D-01062 Dresden, Germany

\* Correspondence: Stephanie.treibmann@tu-dresden.de, Thomas.henle@tu-dresden.de; Tel.: +49-351-463-34647

## List of Supporting Information

**Figure S1.** Simulated digestion experiments in the absence of digestive enzymes and bile.

**Figure S2.** Daily excretion of creatinine via urine.

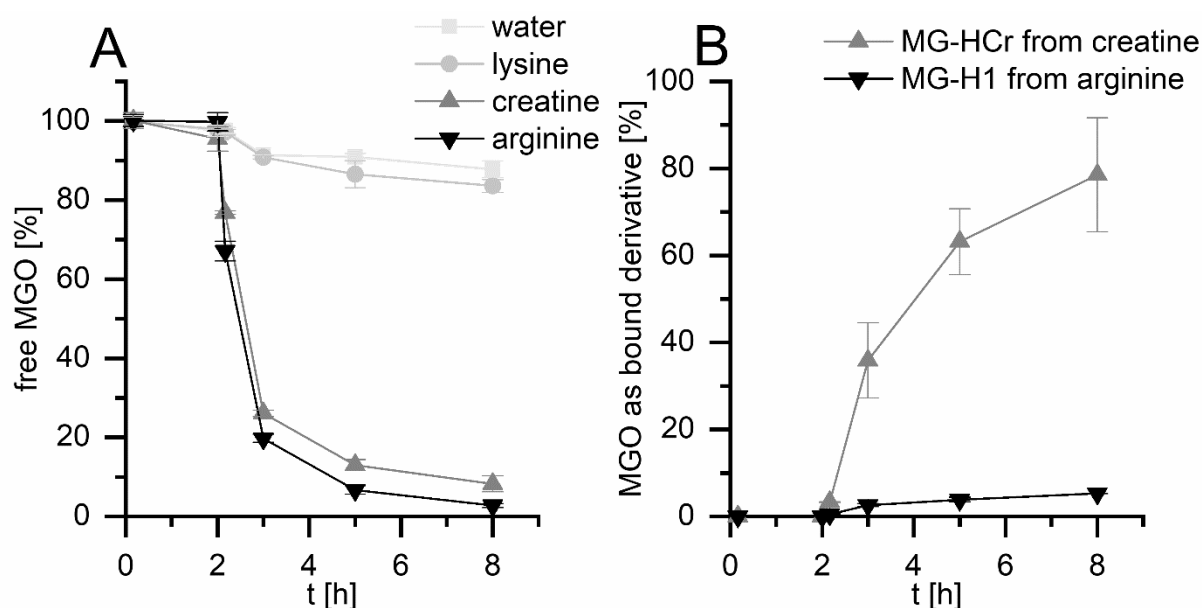

**Figure S1.** Simulated digestion experiments in the absence of digestive enzymes and bile. Simulated digestion experiments (2 h gastric stage, 6 h intestinal stage) of MGO with and without arginine, lysine, and creatine (molar ratio 1:10) in the absence of added digestive enzymes/bile. Decrease of unbound MGO measured with HPLC-UV (A) and (B) formation of bound MGO in the form of MG-HCr (from creatine) and MG-H1 (from arginine) measured with HPLC-ESI-MS/MS (B).

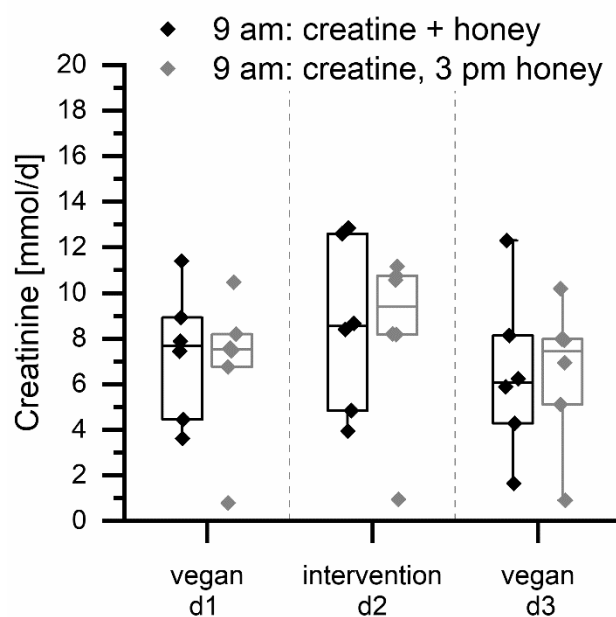

**Figure S2.** Daily excretion of creatinine via urine. Excretion of creatinine in 24 h urine samples of 12 volunteers during a three-day study with an intervention on day 2. Intervention: Group 1 (black): 2.5 g of creatine monohydrate + 65 g of Manuka honey (43 mg MGO) + 3 crispbreads at 9 a.m, Group 2 (grey): 2.5 g of creatine monohydrate at 9 a.m. and 65 g of Manuka honey (43 mg MGO) and 3 crispbreads at 3 p.m.
